# Supplementary material for: Association of Androgen Deprivation Therapy with Osteoporotic Fracture in Patients with Prostate Cancer with Low Tumor Burden Using a Retrospective Population-Based Propensity-Score-Matched Cohort
Source: MDPI journal article supplement (doi:10.3390/cancers15102822), 2023-05-18
Supplement: s1 [file s1]

Supplementary Table S1. General and clinical characteristics of prostate cancer patients according to androgen deprivation therapy (N=17,766)

| Variables                             | Total<br>(N=17,766) |        | Non-user<br>(N=8883) |        | ADT user<br>(N=8883) |        | <i>p-value</i> |
|---------------------------------------|---------------------|--------|----------------------|--------|----------------------|--------|----------------|
|                                       | N                   | (%)    | N                    | (%)    | N                    | (%)    |                |
| Age (years, Mean (SD))                | 68.64               | (6.79) | 68.56                | (6.59) | 68.71                | (6.99) | 0.154          |
| Year at diagnosis                     |                     |        |                      |        |                      |        |                |
| 2008~2010                             | 5854                | 32.95% | 2683                 | 30.20% | 3171                 | 35.70% | <0.001         |
| 2011~2013                             | 5716                | 32.17% | 3056                 | 34.40% | 2660                 | 29.94% |                |
| 2014~2016                             | 6169                | 34.88% | 3144                 | 35.39% | 3052                 | 34.36% |                |
| Urbanicity                            |                     |        |                      |        |                      |        |                |
| Urban (Metropolitan areas)            | 12,284              | 69.14% | 6231                 | 70.15% | 6053                 | 68.14% | 0.038          |
| Rural (Other areas)                   | 5482                | 30.86% | 2652                 | 29.85% | 2830                 | 31.86% |                |
| Insurance type                        |                     |        |                      |        |                      |        |                |
| Self-employed insured                 | 5359                | 30.16% | 2773                 | 31.22% | 2586                 | 29.11% | <0.001         |
| Employee insured                      | 11,788              | 66.35% | 5913                 | 66.57% | 5875                 | 66.14% |                |
| Medical-aid beneficiary               | 619                 | 3.48%  | 197                  | 2.22%  | 422                  | 4.75%  |                |
| Income level (quintile)               |                     |        |                      |        |                      |        |                |
| Q1                                    | 2079                | 11.70% | 921                  | 10.37% | 1158                 | 13.04% | <0.001         |
| Q2                                    | 1711                | 9.63%  | 793                  | 8.93%  | 918                  | 10.33% |                |
| Q3                                    | 2089                | 11.76% | 1001                 | 11.27% | 1088                 | 12.25% |                |
| Q4                                    | 3480                | 19.59% | 1700                 | 19.14% | 1780                 | 20.04% |                |
| Q5                                    | 7530                | 42.38% | 4152                 | 46.74% | 3378                 | 38.03% |                |
| Unknown or Medical-aid                | 877                 | 4.94%  | 316                  | 3.56%  | 561                  | 6.32%  |                |
| Underlying disease                    |                     |        |                      |        |                      |        |                |
| Myocardial infection                  | 1215                | 6.84%  | 555                  | 6.25%  | 660                  | 7.43%  | 0.002          |
| Congestive heart failure              | 3521                | 19.82% | 1578                 | 17.76% | 1943                 | 21.87% | <0.001         |
| Peripheral vascular disease           | 8252                | 46.45% | 4080                 | 45.93% | 4172                 | 46.97% | 0.1664         |
| Cerebrovascular disease               | 6864                | 38.64% | 3295                 | 37.09% | 3569                 | 40.18% | <0.001         |
| Dementia                              | 948                 | 5.34%  | 443                  | 4.99%  | 505                  | 5.69%  | 0.0385         |
| Chronic pulmonary disease             | 14,091              | 79.31% | 7086                 | 79.77% | 7005                 | 78.86% | 0.1335         |
| Peptic ulcer disease                  | 13,628              | 76.71% | 6912                 | 77.81% | 6716                 | 75.61% | <0.001         |
| Mild Liver Disease                    | 12,392              | 69.75% | 6196                 | 69.75% | 6196                 | 69.75% | N/A            |
| Diabetes without chronic complication | 10,812              | 61.01% | 5216                 | 58.93% | 5596                 | 63.07% | <0.001         |
| Diabetes with chronic complication    | 4697                | 26.50% | 2235                 | 25.25% | 2462                 | 27.75% | <0.001         |

|                                                            |        |        |       |        |       |        |        |
|------------------------------------------------------------|--------|--------|-------|--------|-------|--------|--------|
| Hemiplegia or paraplegia                                   | 1066   | 6.01%  | 391   | 4.42%  | 675   | 7.61%  | <0.001 |
| Renal disease                                              | 1740   | 9.82%  | 790   | 8.93%  | 950   | 10.71% | <0.001 |
| Moderate or severe liver disease                           | 507    | 2.86%  | 208   | 2.35%  | 299   | 3.37%  | <0.001 |
| AIDS                                                       | 15     | 0.08%  | 6     | 0.07%  | 9     | 0.10%  | 0.4411 |
| modified CCI                                               |        |        |       |        |       |        |        |
| 0-1                                                        | 1103   | 6.21%  | 630   | 7.09%  | 473   | 5.32%  | <0.001 |
| 2                                                          | 1658   | 9.33%  | 814   | 9.16%  | 844   | 9.50%  |        |
| 3                                                          | 1720   | 9.68%  | 941   | 10.59% | 779   | 8.77%  |        |
| 4+                                                         | 13,285 | 74.78% | 6498  | 73.15% | 6787  | 76.40% |        |
| SEER summarized stage                                      |        |        |       |        |       |        |        |
| Localized                                                  | 11,560 | 65.07% | 5640  | 63.49% | 5920  | 66.64% | <0.001 |
| Regional                                                   | 2963   | 34.93% | 3243  | 36.51% | 2963  | 33.36% |        |
| BMD test (Yes)                                             | 2142   | 12.06% | 841   | 9.47%  | 1,301 | 14.65% | <0.001 |
| Osteoporosis medications (Yes)                             | 181    | 1.02%  | 67    | 0.75%  | 114   | 1.28%  | <0.001 |
| Primary Treatment                                          |        |        |       |        |       |        |        |
| Radiotherapy (Yes)                                         | 2717   | 15.29% | 681   | 7.67%  | 2036  | 22.92% | <0.001 |
| Surgery (Yes)                                              | 6140   | 34.56% | 3660  | 41.20% | 2480  | 27.92% | <0.001 |
| Active surveillance                                        | 4721   | 26.57% | 4721  | 53.15% | 0     | 0.00%  | <0.001 |
| Osteoporotic Fracture (Event)                              | 685    | 3.86%  | 220   | 2.48%  | 465   | 5.23%  | <0.001 |
| Death (after primary fracture in fractured group)          | 113    | 16.50% | 30    | 13.64% | 83    | 17.85% | 0.1654 |
| Index date ~ Death (Month, Mean (SD))                      | 90.06  | 27.72  | 88.28 | 22.52  | 90.71 | 29.48  | 0.6837 |
| Fracture ~ Death (Month, Mean (SD))                        | 47.73  | 25.54  | 41.03 | 21.16  | 50.15 | 26.65  | 0.0937 |
| Overall Follow-up Period (Month, Mean (SD))                | 47.71  | 29.90  | 48.57 | 30.45  | 46.86 | 29.31  | <0.001 |
| Follow-up Period until Primary Fracture (Month, Mean (SD)) | 37.62  | 34.00  | 41.99 | 25.12  | 35.55 | 31.28  | <0.001 |

Supplementary Table S2. Mean group differences before and after the Propensity score matching information

| Tx group      | N      | Mean difference (before PSM) | Matched | Mean difference (after PSM) |
|---------------|--------|------------------------------|---------|-----------------------------|
| Non-ADT group | 16,777 | 0.1485                       | 8,883   | 0.0001                      |
| ADT group     | 11,694 |                              | 8,883   |                             |

Supplementary Table S3. Univariate and Multivariate Cox proportional hazard ratio model for risk of osteoporotic fracture according to the sites

| Variables                     | Hip fracture     |                       |            |                        |                       |            | Spine fracture   |                   |            |                        |                       |            | Wrist fracture   |                       |         |                        |                   |         |
|-------------------------------|------------------|-----------------------|------------|------------------------|-----------------------|------------|------------------|-------------------|------------|------------------------|-----------------------|------------|------------------|-----------------------|---------|------------------------|-------------------|---------|
|                               | Univariate Model |                       |            | Multivariate Model (2) |                       |            | Univariate Model |                   |            | Multivariate Model (2) |                       |            | Univariate Model |                       |         | Multivariate Model (2) |                   |         |
|                               | HR               | (95% CI)              | p-value    | HR                     | (95% CI)              | p-value    | HR               | (95% CI)          | p-value    | HR                     | (95% CI)              | p-value    | HR               | (95% CI)              | p-value | HR                     | (95% CI)          | p-value |
| Androgen deprivation therapy  |                  |                       |            |                        |                       |            |                  |                   |            |                        |                       |            |                  |                       |         |                        |                   |         |
| Non-user                      | 1.000            | (ref)                 | -          | 1.00<br>0              | (ref)                 | -          | 1.00<br>0        | (ref)             |            | 1.00<br>0              | (ref)                 |            | 1.00<br>0        | (ref)                 |         | 1.000                  | (ref)             |         |
| ADT user                      | 2.397            | (1.715<br>-<br>3.350) | <0.00<br>1 | 1.84<br>2              | (1.298<br>-<br>2.615) | 0.001      | 2.44<br>6        | (1.934-<br>3.095) | <0.00<br>1 | 2.08<br>0              | (1.628<br>-<br>2.658) | <0.00<br>1 | 1.84<br>2        | (1.401<br>-<br>2.422) | <0.001  | 1.749                  | (1.316-<br>2.324) | 0.000   |
| Age at index date             | 1.093            | (1.093<br>-<br>1.152) | <0.00<br>1 | 1.09<br>7              | (1.066<br>-<br>1.128) | <0.00<br>1 | 1.08<br>9        | (1.089-<br>1.13)  | <0.00<br>1 | 1.09<br>5              | (1.074<br>-<br>1.117) | <0.00<br>1 | 0.98<br>9        | (0.989<br>-1.03)      | 0.361   | 1.003                  | (0.982-<br>1.024) | 0.775   |
| Year at diagnosis             |                  |                       |            |                        |                       |            |                  |                   |            |                        |                       |            |                  |                       |         |                        |                   |         |
| 2008~2010                     | 1.000            | (ref)                 | -          | 1.00<br>0              | (ref)                 | -          | 1.00<br>0        | (ref)             |            | 1.00<br>0              | (ref)                 |            | 1.00<br>0        | (ref)                 |         | 1.000                  | (ref)             |         |
| 2011~2013                     | 0.840            | (0.585<br>-<br>1.206) | 0.344      | 1.02<br>9              | (0.712<br>-<br>1.487) | 0.879      | 0.69<br>2        | (0.528-<br>0.907) | 0.008      | 0.84<br>1              | (0.639<br>-<br>1.107) | 0.217      | 0.89<br>2        | (0.651<br>-<br>1.221) | 0.475   | 0.957                  | (0.697-<br>1.315) | 0.788   |
| 2014~2016                     | 0.778            | (0.422<br>-<br>1.434) | 0.421      | 0.78<br>9              | (0.429<br>-<br>1.451) | 0.445      | 1.18<br>1        | (0.807-<br>1.73)  | 0.392      | 1.20<br>2              | (0.82-<br>1.762)      | 0.345      | 0.93<br>4        | (0.579<br>-<br>1.505) | 0.779   | 0.960                  | (0.595-<br>1.548) | 0.866   |
| Urbanicity                    |                  |                       |            |                        |                       |            |                  |                   |            |                        |                       |            |                  |                       |         |                        |                   |         |
| Urban<br>(Metropolitan areas) | 0.963            | (0.693<br>-<br>1.339) | 0.824      | 1.05<br>7              | (0.758<br>-<br>1.474) | 0.743      | 0.82<br>7        | (0.66-<br>1.036)  | 0.098      | 0.91<br>3              | (0.728<br>-<br>1.146) | 0.435      | 1.14<br>7        | (0.857<br>-<br>1.535) | 0.356   | 1.194                  | (0.89-<br>1.6)    | 0.237   |
| Rural (Other areas)           | 1.000            | (ref)                 | -          | 1.00<br>0              | (ref)                 | -          | 1.00<br>0        | (ref)             |            | 1.00<br>0              | (ref)                 |            | 1.00<br>0        | (ref)                 |         | 1.000                  | (ref)             |         |
| Income level<br>(quintile)    |                  |                       |            |                        |                       |            |                  |                   |            |                        |                       |            |                  |                       |         |                        |                   |         |
| Q1                            | 1.000            | (ref)                 | -          | 1.00<br>0              | (ref)                 | -          | 1.00<br>0        | (ref)             |            | 1.00<br>0              | (ref)                 |            | 1.00<br>0        | (ref)                 |         | 1.000                  | (ref)             |         |
| Q2                            | 0.596            | (0.328<br>-<br>1.083) | 0.090      | 0.63<br>4              | (0.301<br>-<br>1.334) | 0.229      | 0.96<br>6        | (0.578-<br>1.616) | 0.896      | 1.01<br>5              | (0.608<br>-<br>1.694) | 0.955      | 1.07<br>2        | (0.597<br>-<br>1.926) | 0.816   | 1.116                  | (0.623-<br>2)     | 0.712   |
| Q3                            | 0.916            | (0.497<br>-<br>1.691) | 0.780      | 0.90<br>4              | (0.491<br>-<br>1.666) | 0.746      | 1.35<br>1        | (0.864-<br>2.113) | 0.187      | 1.35<br>1              | (0.864<br>-<br>2.112) | 0.187      | 1.36<br>7        | (0.811<br>-<br>2.306) | 0.240   | 1.397                  | (0.829-<br>2.354) | 0.209   |
| Q4                            | 0.596            | (0.328<br>-<br>1.083) | 0.090      | 0.57<br>1              | (0.314<br>-<br>1.036) | 0.065      | 1.05<br>4        | (0.69-<br>1.609)  | 0.809      | 1.00<br>3              | (0.657<br>-<br>1.532) | 0.988      | 1.00<br>0        | (0.605<br>-<br>1.650) | 0.999   | 1.026                  | (0.621-<br>1.693) | 0.921   |

|                                                       |       |                       |            |           |                       |            |           |                        |            |           |                       |            |           |                       |       |       |                   |       |
|-------------------------------------------------------|-------|-----------------------|------------|-----------|-----------------------|------------|-----------|------------------------|------------|-----------|-----------------------|------------|-----------|-----------------------|-------|-------|-------------------|-------|
| Q5                                                    | 0.833 | (0.513<br>-<br>1.355) | 0.463      | 0.72<br>2 | (0.443<br>-<br>1.178) | 0.193      | 1.01<br>6 | (0.695-<br>1.485)      | 0.935      | 0.90<br>3 | (0.616<br>-<br>1.322) | 0.599      | 0.87<br>5 | (0.556<br>-<br>1.376) | 0.563 | 0.913 | (0.579-<br>1.437) | 0.693 |
| Unknown or<br>Medical-aid<br>SEER summarized<br>stage | 1.829 | (0.975<br>-<br>3.432) | 0.060      | 1.12<br>6 | (0.593<br>-<br>2.138) | 0.717      | 1.81<br>9 | (1.099-<br>3.01)       | 0.020      | 1.14<br>7 | (0.689<br>-1.91)      | 0.597      | 1.42<br>8 | (0.759<br>-<br>2.688) | 0.270 | 1.314 | (0.697-<br>2.478) | 0.398 |
| Localized                                             | 1.000 | (ref)                 | -          | 1.00<br>0 | (ref)                 | -          | 1.00<br>0 | (ref)                  |            | 1.00<br>0 | (ref)                 |            | 1.00<br>0 | (ref)                 |       | 1.000 | (ref)             |       |
| Regional                                              | 0.484 | (0.329<br>-<br>0.712) | 0.000      | 0.72<br>8 | (0.488<br>-<br>1.086) | 0.120      | 0.72<br>5 | (0.569-<br>0.925)      | 0.010      | 1.03<br>2 | (0.801<br>-<br>1.331) | 0.805      | 0.90<br>6 | (0.683<br>-<br>1.202) | 0.494 | 0.961 | (0.715-<br>1.292) | 0.793 |
| modified CCI                                          |       |                       |            |           |                       |            |           |                        |            |           |                       |            |           |                       |       |       |                   |       |
| 0-1                                                   | 1.000 | (ref)                 | -          | 1.00<br>0 | (ref)                 | -          | 1.00<br>0 | (ref)                  |            | 1.00<br>0 | (ref)                 |            | 1.00<br>0 | (ref)                 |       | 1.000 | (ref)             |       |
| 2                                                     | 0.868 | (0.245<br>-<br>3.075) | 0.826      | 0.63<br>9 | (0.19-<br>2.146)      | 0.469      | 1.88<br>1 | (0.613-<br>5.769)      | 0.269      | 1.31      | (0.449<br>-<br>3.824) | 0.622      | 0.69<br>7 | (0.213<br>-<br>2.284) | 0.551 | 0.659 | (0.211-<br>2.064) | 0.474 |
| 3                                                     | 0.810 | (0.228<br>-<br>2.869) | 0.744      | 0.63<br>9 | (0.19-<br>2.143)      | 0.468      | 2.70<br>8 | (0.926-<br>7.923)      | 0.069      | 2.09<br>6 | (0.752<br>-<br>5.836) | 0.157      | 2.40<br>4 | (0.91-<br>6.348)      | 0.077 | 2.220 | (0.869-<br>5.667) | 0.095 |
| 4+                                                    | 2.436 | (0.902<br>-<br>6.578) | 0.079      | 1.38<br>4 | (0.535<br>-<br>3.581) | 0.503      | 4.89<br>7 | (1.826-<br>13.135<br>) | 0.002      | 2.84<br>1 | (1.114<br>-<br>7.248) | 0.029      | 2.54<br>9 | (1.049<br>-<br>6.195) | 0.039 | 2.218 | (0.942-<br>5.222) | 0.068 |
| BMD test (Yes)                                        | 2.591 | (1.819<br>-<br>3.691) | <.000<br>1 | 2.16<br>0 | (1.497<br>-<br>3.117) | <.000<br>1 | 2.31<br>3 | (1.79-<br>2.988)       | <.000<br>1 | 1.79<br>7 | (1.372<br>-<br>2.352) | <.000<br>1 | 1.28<br>1 | (0.881<br>-<br>1.862) | 0.195 | 1.228 | (0.84-<br>1.797)  | 0.290 |
| Osteoporosis<br>medications (Yes)                     | 2.505 | (0.929<br>-<br>6.758) | 0.070      | 1.23<br>5 | (0.468<br>-3.26)      | 0.671      | 4.12<br>4 | (2.368-<br>7.181)      | <.000<br>1 | 2.18<br>0 | (1.229<br>-<br>3.866) | 0.008      | 0.21<br>9 | (0.219<br>-3.54)      | 0.857 | 0.853 | (0.24-<br>3.039)  | 0.807 |
| Radiotherapy (Yes)                                    | 1.022 | (0.657<br>-<br>1.588) | 0.925      | 0.96<br>3 | (0.615<br>-<br>1.506) | 0.868      | 0.87<br>7 | (0.632-<br>1.217)      | 0.433      | 0.82<br>3 | (0.591<br>-<br>1.148) | 0.252      | 1.15<br>6 | (0.806<br>-<br>1.659) | 0.431 | 1.035 | (0.714-<br>1.499) | 0.858 |

Supplementary Table S4. Cumulative survival rate for osteoporotic fracture in prostate cancer patients along with follow-up period

| Androgen<br>deprivation therapy        | Follow-up period(year)                |                                         |                                    |                                         |                                 |                                         |                                 |                                         | p-value for<br>long-rank<br>test |
|----------------------------------------|---------------------------------------|-----------------------------------------|------------------------------------|-----------------------------------------|---------------------------------|-----------------------------------------|---------------------------------|-----------------------------------------|----------------------------------|
|                                        | 1 year                                |                                         | 3 year                             |                                         | 5 year                          |                                         | 7 year                          |                                         |                                  |
|                                        | No of<br>events /<br>No of at<br>risk | Cumulative<br>survival rate<br>(95% CI) | No of events<br>/ No of at<br>risk | Cumulative<br>survival rate<br>(95% CI) | No of events /<br>No of at risk | Cumulative<br>survival rate<br>(95% CI) | No of events /<br>No of at risk | Cumulative<br>survival rate<br>(95% CI) |                                  |
| Osteoporotic fracture(Composite)       |                                       |                                         |                                    |                                         |                                 |                                         |                                 |                                         |                                  |
| Non-user(N=8,883)                      | 29/7549                               | 0.996(0.995-0.998)                      | 70/5482                            | 0.986(0.983-0.989)                      | 66/3304                         | 0.970(0.966-0.975)                      | 44/1411                         | 0.952(0.945-0.959)                      | <0.001                           |
| ADT user(N=8,883)                      | 72/7826                               | 0.991(0.990-0.993)                      | 190/4991                           | 0.962(0.958-0.967)                      | 120/3032                        | 0.934(0.928-0.941)                      | 68/1312                         | 0.906(0.897-0.915)                      |                                  |
| Osteoporotic fracture(Subtype:Hip)     |                                       |                                         |                                    |                                         |                                 |                                         |                                 |                                         |                                  |
| Non-user(N=8,883)                      | 3/7573                                | 1.000(0.999-1.000)                      | 17/5542                            | 0.997(0.996-0.998)                      | 19/3371                         | 0.993(0.990-0.995)                      | 9/1456                          | 0.989(0.985-0.992)                      | <0.001                           |
| ADT user(N=8,883)                      | 16/7881                               | 0.998(0.997-0.999)                      | 45/5125                            | 0.991(0.989-0.993)                      | 29/3188                         | 0.984(0.981-0.988)                      | 18/1411                         | 0.977(0.972-0.982)                      |                                  |
| Osteoporotic fracture(Subtype:Spine)   |                                       |                                         |                                    |                                         |                                 |                                         |                                 |                                         |                                  |
| Non-user(N=8,883)                      | 13/7564                               | 0.998(0.997-0.999)                      | 31/5525                            | 0.993(0.991-0.995)                      | 31/3351                         | 0.986(0.983-0.989)                      | 17/1443                         | 0.979(0.974-0.984)                      | <0.001                           |
| ADT user(N=8,883)                      | 34/7861                               | 0.996(0.995-0.997)                      | 88/5083                            | 0.983(0.979-0.986)                      | 57/3138                         | 0.969(0.964-0.974)                      | 43/1370                         | 0.951(0.944-0.958)                      |                                  |
| Osteoporotic fracture(Subtype:Wrist)   |                                       |                                         |                                    |                                         |                                 |                                         |                                 |                                         |                                  |
| Non-user(N=8,883)                      | 12/7561                               | 0.998(0.997-0.999)                      | 21/5531                            | 0.995(0.993-0.997)                      | 18/3362                         | 0.991(0.988-0.993)                      | 19/1451                         | 0.983(0.979-0.987)                      | <0.001                           |
| ADT user(N=8,883)                      | 22/7871                               | 0.997(0.996-0.998)                      | 56/5094                            | 0.989(0.986-0.991)                      | 39/3149                         | 0.979(0.975-0.983)                      | 20/1384                         | 0.971(0.969-0.976)                      |                                  |
| Osteoporotic fracture(Subtype:Humerus) |                                       |                                         |                                    |                                         |                                 |                                         |                                 |                                         |                                  |
| Non-user(N=16,794)                     | 1/7576                                | 1.000(1.000-1.000)                      | 4/5552                             | 0.999(0.999-1.000)                      | 2/3387                          | 0.999(0.998-1.000)                      | 0/1465                          | 0.999(0.998-1.000)                      | 0.328                            |
| ADT user(N=11,696)                     | 1/7894                                | 1.000(1.000-1.000)                      | 6/5154                             | 0.999(0.998-1.000)                      | 3/3219                          | 0.998(0.997-0.999)                      | 1/1426                          | 0.998(0.996-0.999)                      |                                  |

(Abbreviations) CI, Confidence Interval; Androgen deprivation therapy, ADT
